# Supplementary material for: MDACl2-Modified SnO2 Film for Efficient Planar Perovskite Solar Cells
Source: MDPI journal article supplement (doi:10.3390/molecules28062668), 2023-03-15
Supplement: s1 [file s1]

## **Supporting Information:**

### **MDACl<sub>2</sub>-modified SnO<sub>2</sub> film for efficient planar perovskite solar cells**

Yaodong Xiao, Xiangqian Cui, Boyuan Xiang, Yanping Chen, Chaoyue Zhao, Lihong Wang, Chuqun Yang, Guangye Zhang, Chen Xie, Yulai Han, Mingxia Qiu \*, Shunpu Li \* and Peng You \*

College of New Materials and New Energies, Shenzhen Technology University, Shenzhen, 518118, China.

\* Correspondence: youpeng@sztu.edu.cn (P.Y.); lishunpu@sztu.edu.cn (S.L.); qiumingxia@sztu.edu.cn (M.Q.)

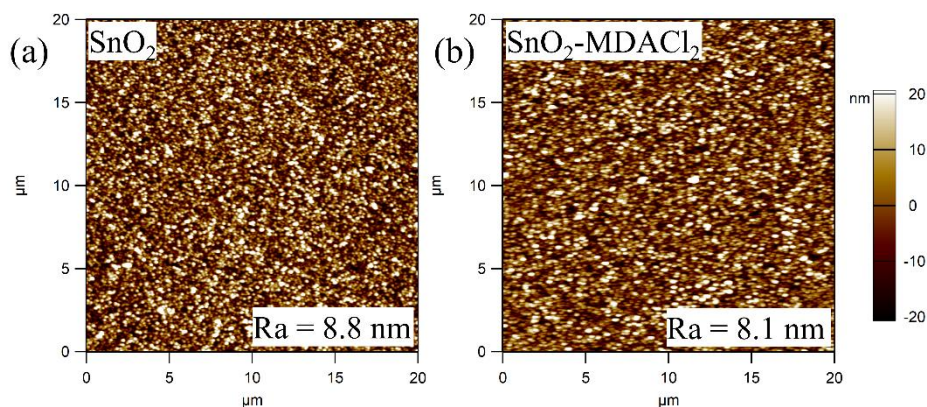

**Figure S1.** (a,b) AFM images of  $\text{SnO}_2$  and  $\text{SnO}_2\text{-MDACl}_2$  films grown on glass substrates.

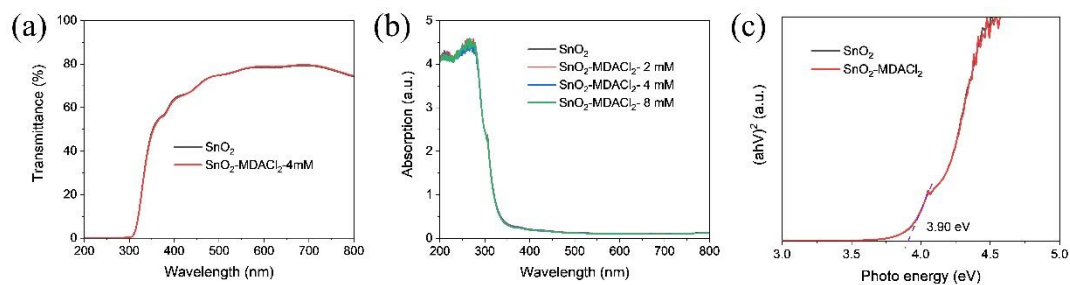

**Figure S2.** (a) Transmission spectra, (b) absorption spectra and (c) Tauc plots for the  $\text{SnO}_2$  and  $\text{SnO}_2\text{-MDACl}_2$  films.

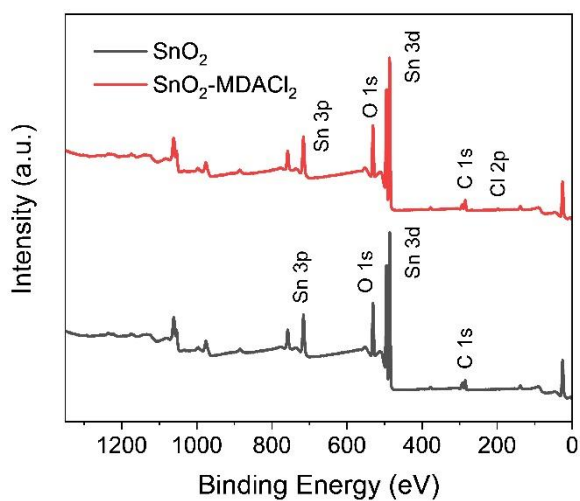

**Figure S3.** Full XPS spectra of the  $\text{SnO}_2$ ,  $\text{SnO}_2\text{-MDACl}_2$  films.

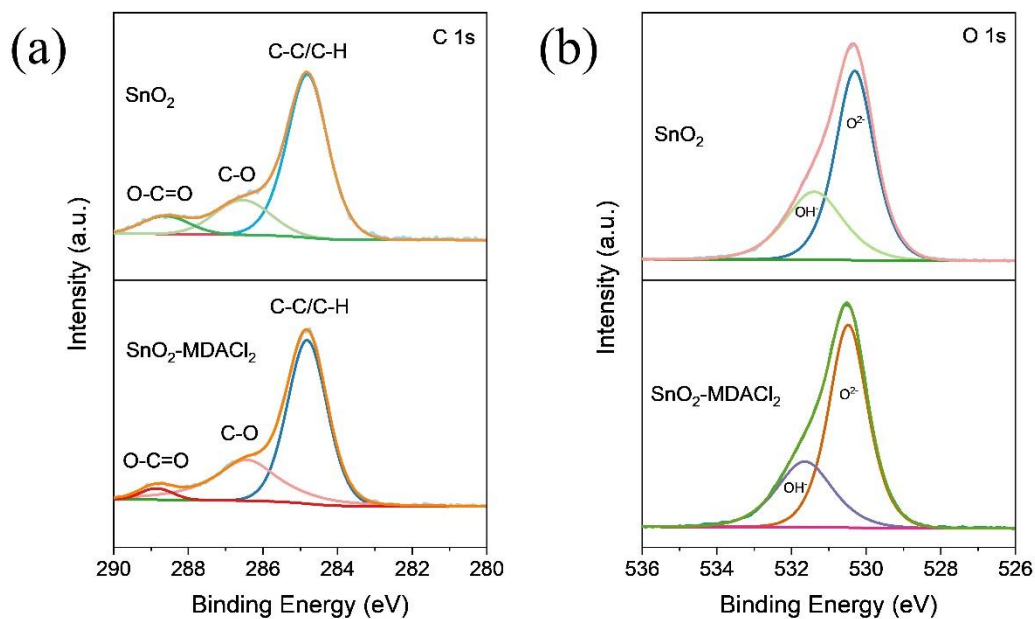

**Figure S4.** High-resolution (a)  $\text{C } 1s$  and (b)  $\text{O } 1s$  XPS spectra of the  $\text{SnO}_2$  and  $\text{SnO}_2\text{-MDACL}_2$  films.

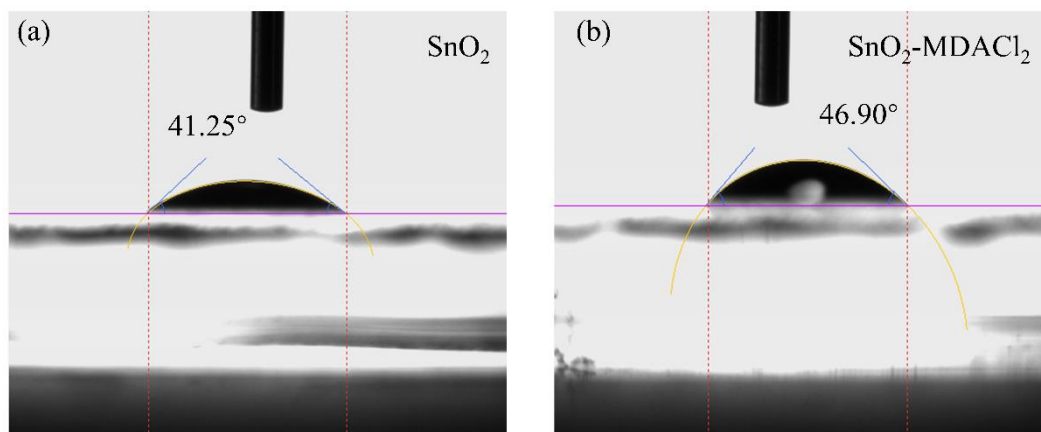

**Figure S5.** Contact angles of water droplets on the (a)  $\text{SnO}_2$  and (b)  $\text{SnO}_2\text{-MDACL}_2$  films.

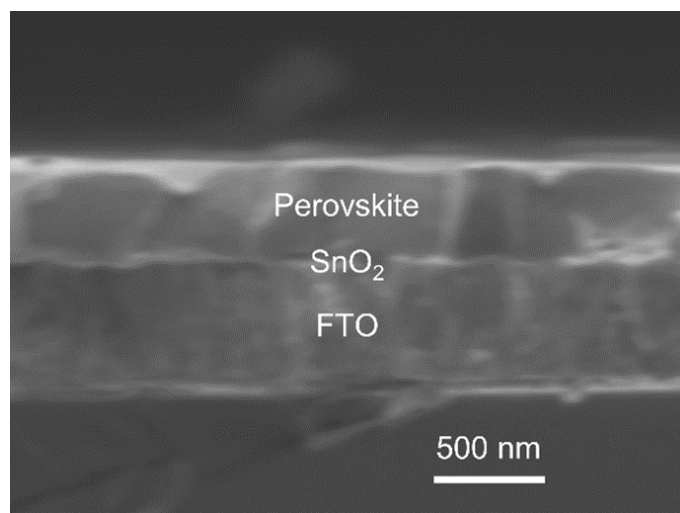

**Figure S6.** Cross-sectional SEM image of FTO/ SnO<sub>2</sub>-MDACL<sub>2</sub>/perovskite sample.

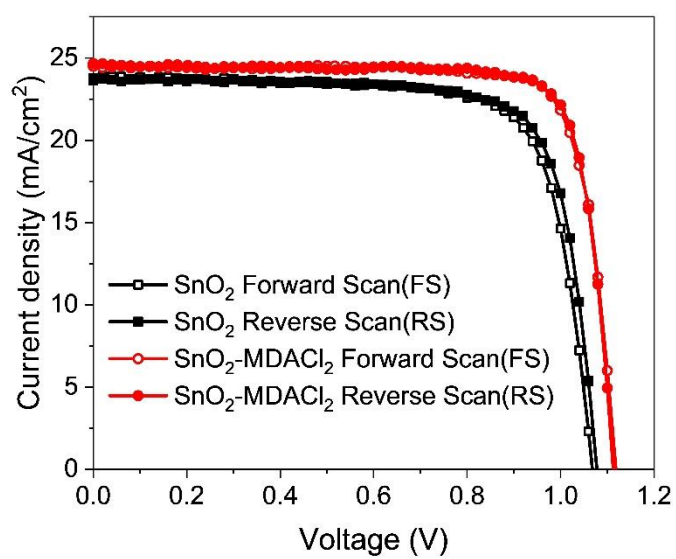

**Figure S7.** J-V curves of the PSCs based on SnO<sub>2</sub> and SnO<sub>2</sub>-MDACL<sub>2</sub> ETLs under reverse scan and forward scans.

**Table S1.** Photovoltaic parameters of PSCs prepared by using MDACl<sub>2</sub>-incorporated SnO<sub>2</sub> precursor solution and direct spin-coating MDACl<sub>2</sub> solution (4mM) on top of the SnO<sub>2</sub> film (statistical data of 20 devices for each conditions).

| ETL                                                                   | Voc (V)     | Jsc (mA/cm <sup>2</sup> ) | FF (%)     | PCE (%)    |
|-----------------------------------------------------------------------|-------------|---------------------------|------------|------------|
| SnO <sub>2</sub>                                                      | 1.075±0.010 | 23.35±0.39                | 75.39±1.42 | 18.92±0.47 |
| SnO <sub>2</sub> +MDACl <sub>2</sub><br>(mixed precursor<br>solution) | 1.105±0.007 | 24.45±0.22                | 79.65±1.24 | 21.53±0.38 |
| SnO <sub>2</sub> /MDACl <sub>2</sub><br>(direct spin-coating)         | 1.098±0.009 | 24.09±0.14                | 77.10±1.23 | 20.41±0.44 |

**Table S2.** Band gaps (E<sub>g</sub>), secondary-electron cutoff (E<sub>cutoff</sub>), fermi level (E<sub>F</sub>), valence band (E<sub>VB</sub>) and conduction band (E<sub>CB</sub>) for SnO<sub>2</sub> film and SnO<sub>2</sub>-MDACl<sub>2</sub> films.

| ETL                                  | E <sub>g</sub> (eV) | E <sub>cutoff</sub> (eV) | E <sub>F</sub> (eV) | E <sub>VB</sub> (eV) | E <sub>CB</sub> (eV) |
|--------------------------------------|---------------------|--------------------------|---------------------|----------------------|----------------------|
| SnO <sub>2</sub>                     | 3.90                | 15.72                    | 5.50                | 8.29                 | 4.39                 |
| SnO <sub>2</sub> -MDACl <sub>2</sub> | 3.90                | 15.56                    | 5.66                | 8.13                 | 4.23                 |

**Table S3.** Conductivities of FTO/SnO<sub>2</sub>-MDACl<sub>2</sub>/Ag with different doping concentrations.

| ETL                     | SnO <sub>2</sub>      | SnO <sub>2</sub> -MDACl <sub>2</sub><br>2mM | SnO <sub>2</sub> -MDACl <sub>2</sub><br>4mM | SnO <sub>2</sub> -MDACl <sub>2</sub><br>8mM |
|-------------------------|-----------------------|---------------------------------------------|---------------------------------------------|---------------------------------------------|
| Conductivity<br>(mS/cm) | 2.73×10 <sup>-3</sup> | 4.26×10 <sup>-3</sup>                       | 5.27×10 <sup>-3</sup>                       | 4.13×10 <sup>-3</sup>                       |

**Table S4.** Fitting parameters of the TRPL spectra for Glass/FTO/SnO<sub>2</sub>/perovskite films. The average time constant  $\tau_{ave}$  was calculated according to the equation:  $\tau_{ave} = (A_1\tau_1^2 + A_2\tau_2^2) / (A_1\tau_1 + A_2\tau_2)$ .

| ETL                                  | A <sub>1</sub> | $\tau_1$ (ns) | A <sub>2</sub> | $\tau_2$ (ns) | $\tau_{ave}$ (ns) |
|--------------------------------------|----------------|---------------|----------------|---------------|-------------------|
| SnO <sub>2</sub>                     | 0.625          | <b>21.84</b>  | 0.457          | <b>110.10</b> | <b>91.27</b>      |
| SnO <sub>2</sub> -MDACl <sub>2</sub> | 0.886          | <b>11.67</b>  | 0.140          | <b>91.23</b>  | <b>55.64</b>      |

**Table S5.** Fitting values of  $R_s$  and  $R_{rec}$  of the corresponding devices in dark state

| <b>ETL</b>                           | <b><math>R_s</math> (<math>\Omega</math>)</b> | <b><math>R_{rec}</math> (<math>\Omega</math>)</b> |
|--------------------------------------|-----------------------------------------------|---------------------------------------------------|
| SnO <sub>2</sub>                     | 37.16                                         | 217.3                                             |
| SnO <sub>2</sub> -MDACl <sub>2</sub> | 30.78                                         | 337.3                                             |
